# Supplementary material
Source: PubMed Central journal article supplement (PMC4002124)
Supplement: la403559t_si_001.pdf [file la403559t_si_001.pdf]

Supporting Information

**Genetically Programmable Thermoresponsive  
Plasmonic Gold/Silk-Elastin Protein Core/Shell Nanoparticles**

Yinan Lin,<sup>†,§</sup> Xiaoxia Xia,<sup>‡,§</sup> Ming Wang,<sup>†,§</sup> Qianrui Wang,<sup>†</sup>

Bo An,<sup>†</sup> Hu Tao,<sup>†</sup> Qiaobing Xu,<sup>†</sup> Fiorenzo Omenetto,<sup>†</sup> and David L. Kaplan<sup>\*,†</sup>

<sup>†</sup> Department of Biomedical Engineering, Tufts University, 4 Colby Street, Medford, MA,  
02155

<sup>‡</sup> State Key Laboratory of Microbial Metabolism, School of Life Sciences and Biotechnology,  
Shanghai Jiaotong University, 800 Dong-chuan Road, Shanghai, 200240, China



**Figure S1.** MALDI-TOF mass spectra of the recombinant SELPs: (a) S4E8G-3mer, (b) -8mer, (c) -13mer and (d) -18mer.



**Figure S2.** Surface functionalization of gold nanoparticles for molecular recognition of the histidine-tagged S4E8Gs following the method published by Kitai *et al.*<sup>1</sup>



**Figure S3.** X-ray photoelectron spectroscopy (XPS) characterizations of the Au-NTA-Ni<sup>2+</sup> and Au-NTA-Ni<sup>2+</sup>-SELP NPs deposited on silicon wafers.

### **Purification of Au-S4E8G NPs:**

After the incubation of S4E8G with gold nanoparticles, the mixture was then centrifuged at 13,000 rpm for 15 minutes, followed by another two times of wash with Tris buffer (10 mM, pH = 8.0) to remove excess SELP. The obtained purified SELPs functionalized nanoparticles were then dispersed in Tris buffer for TEM, DLS, and UV-Vis spectroscopy studies.

### ***References***

S1 T. Kitai, Y. Watanabe, Y. Y. Toyoshima, T. Kobayashi, T. Murayama, H. Sakaue, H. Suzuki, T. Takahagi, *Japanese Journal of Applied Physics* **2011**, *50*, 095002.
